# Supplementary material for: Holey two-dimensional transition metal oxide nanosheets for efficient energy storage
Source: Springer Nature journal article supplement (doi:10.1038/ncomms15139), 2017-04-26
Supplement: 41467_2017_BFncomms15139_MOESM3549_ESM.pdf [file 41467_2017_BFncomms15139_MOESM3549_ESM.pdf]

## Supplementary Figures

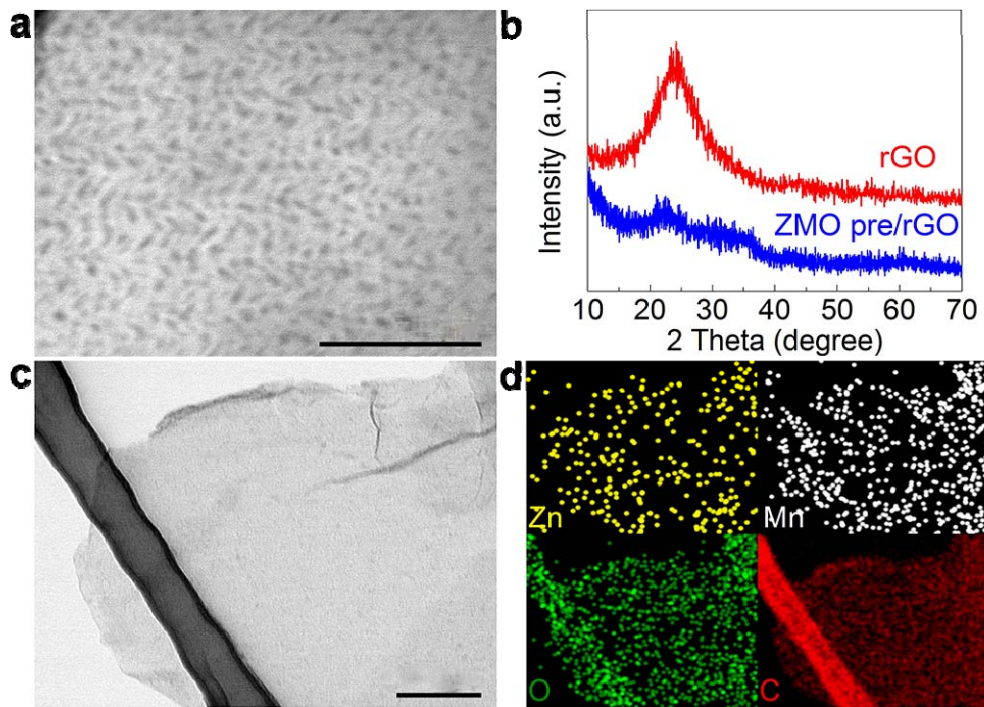

**Supplementary Figure 1 | Characterization of ZMO precursor/rGO.** (a) STEM image of ZMO precursor/rGO. Scale bar, 50 nm. (b) XRD patterns of reduced graphene oxide (rGO) and ZMO precursor/rGO. (c) Enlarged STEM image and (d) corresponding elemental mapping of ZMO precursor/rGO. Scale bar in c, 100 nm.

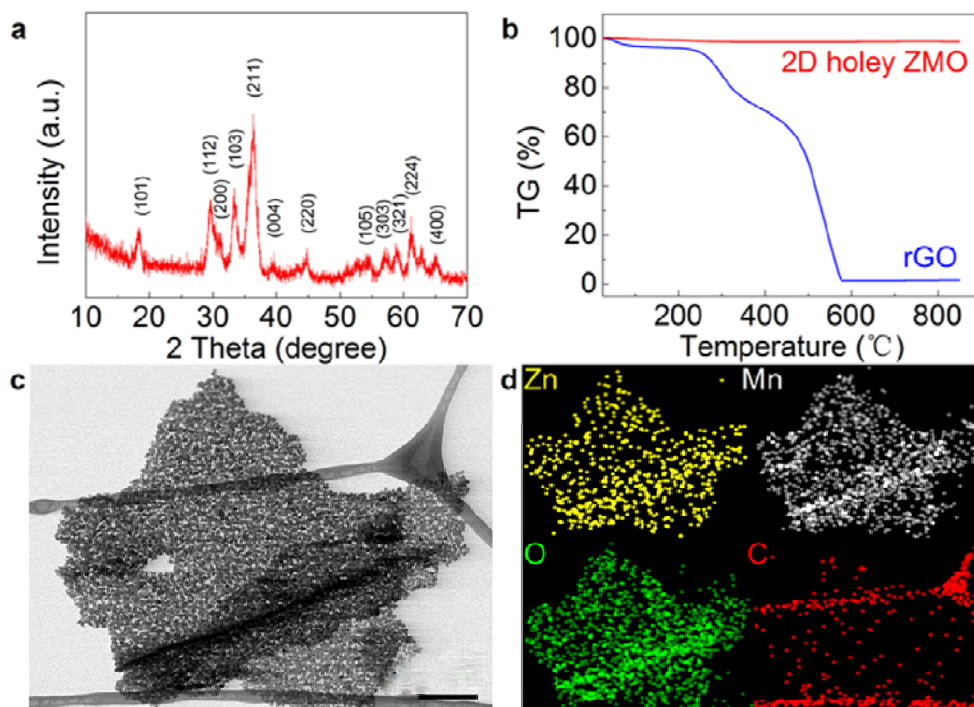

**Supplementary Figure 2 | Characterization of 2D holey ZMO nanosheets.** (a) XRD pattern of 2D holey ZMO nanosheets indicating the conversion of the precursor compound into spinel  $ZnMn_2O_4$  (JCPDS card No. 24-1133). (b) TG analysis of reduced graphene oxide (rGO) and 2D holey ZMO nanosheets. (c) STEM image and (d) corresponding elemental mapping of 2D holey ZMO nanosheets. Scale bar in c, 200 nm.

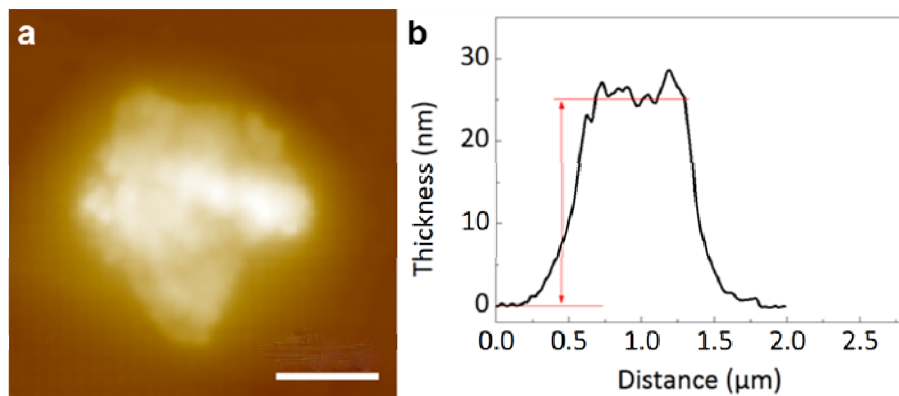

**Supplementary Figure 3 | AFM image and the corresponding height profile of 2D holey ZMO nanosheets obtained under 400 °C. (a) AFM image of ZMO nanosheets. Scale bar, 500 nm. (b) Height profile of ZMO nanosheets.**

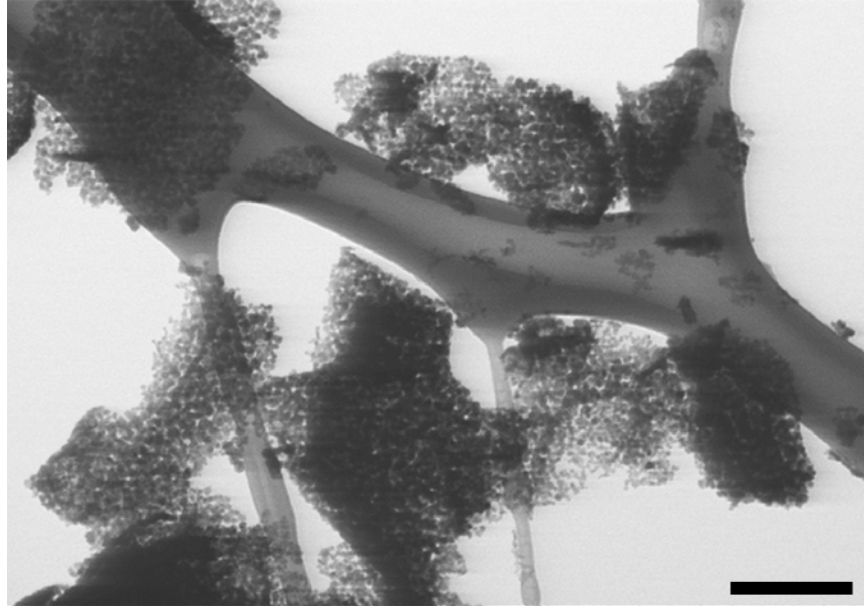

**Supplementary Figure 4 | Low magnification SEM image of ZMO nanosheets obtained under 400 °C. Scale bar, 200 nm.**

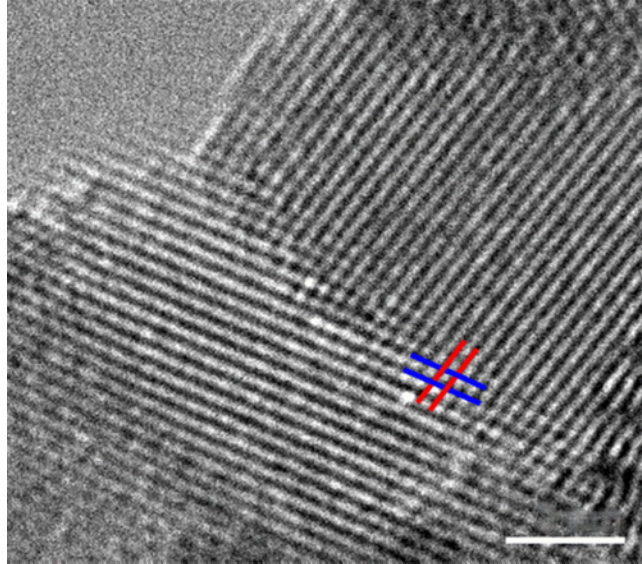

**Supplementary Figure 5 | HRTEM image of 2D holey ZMO nanosheets.** The crossed fringes in the overlapped domains reveal that the ZMO nanoparticles are chemically connected with each other. Scale bar, 2 nm.

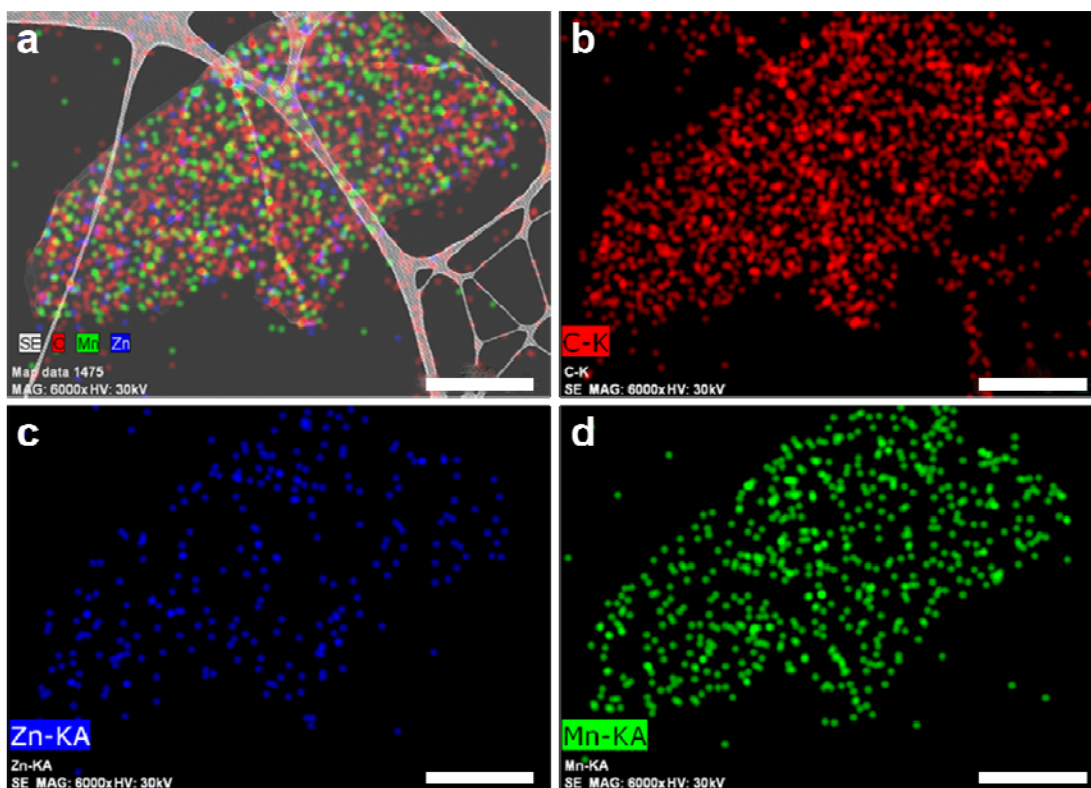

**Supplementary Figure 6 | EDX mapping of GO nanosheets after stirring for enough time with  $\text{Zn}^{2+}$  and  $\text{Mn}^{2+}$  cations, showing the good adsorption of  $\text{Zn}^{2+}$  and  $\text{Mn}^{2+}$  cations onto GO nanosheets. (a) STEM image of GO nanosheets adsorbed with  $\text{Zn}^{2+}$  and  $\text{Mn}^{2+}$  cations. (b) C element distribution in the precursor nanosheets. (c) Zn element distribution in the precursor nanosheets. (d) Mn element distribution in the precursor nanosheets. Scale bar in all images, 5  $\mu\text{m}$ .**

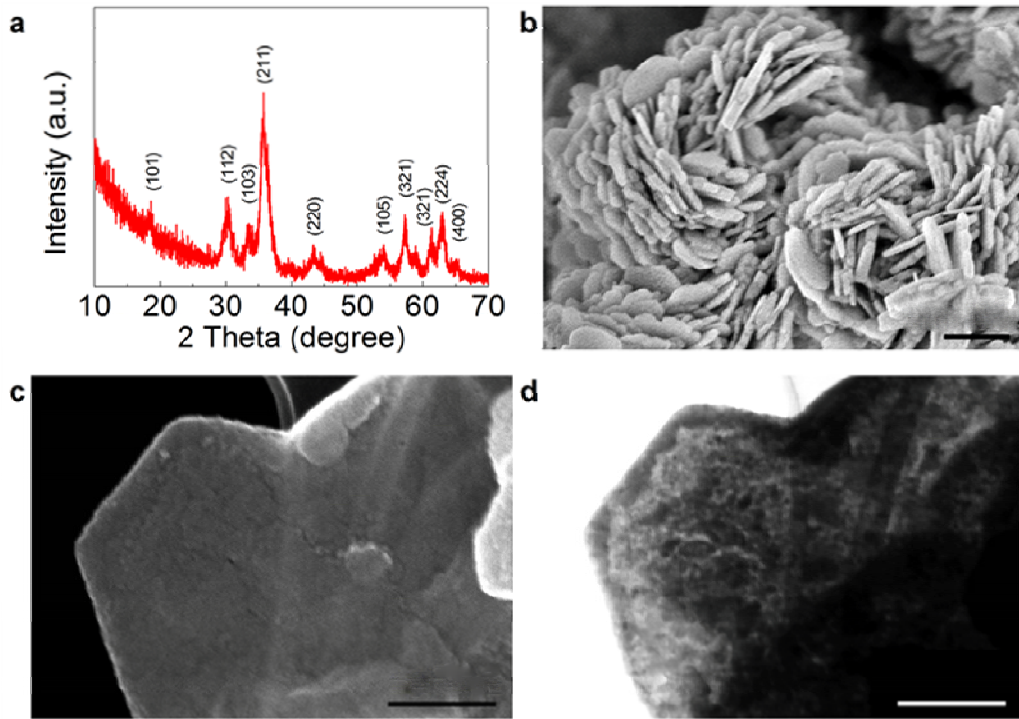

**Supplementary Figure 7 | Characterization of free ZMO particles synthesized without addition of GO. (a) XRD patterns of free ZMO sample. (b) SEM image of free ZMO. Scale bar, 500 nm. (c) Enlarged SEM and (d) corresponding STEM images of free ZMO. Scale bar in c and d, 100 nm.**

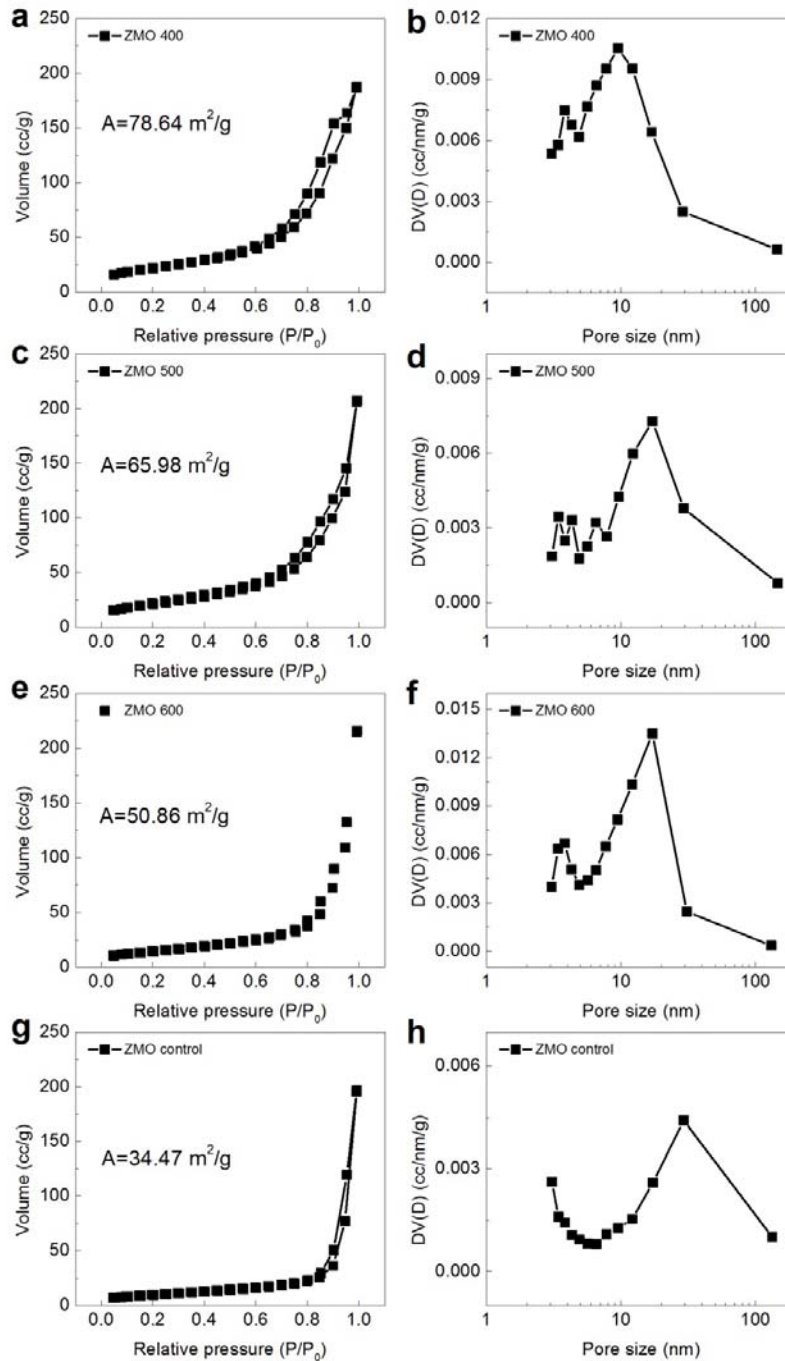

**Supplementary Figure 8 | Isotherm results and BJH pore size distribution of ZMO nanosheets prepared at different calcination temperatures. (a, b) ZMO nanosheets at 400 °C; (c, d) ZMO nanosheets at 500 °C; (e, f) ZMO nanosheets at 600 °C; (g, h) control ZMO nanoplates.**



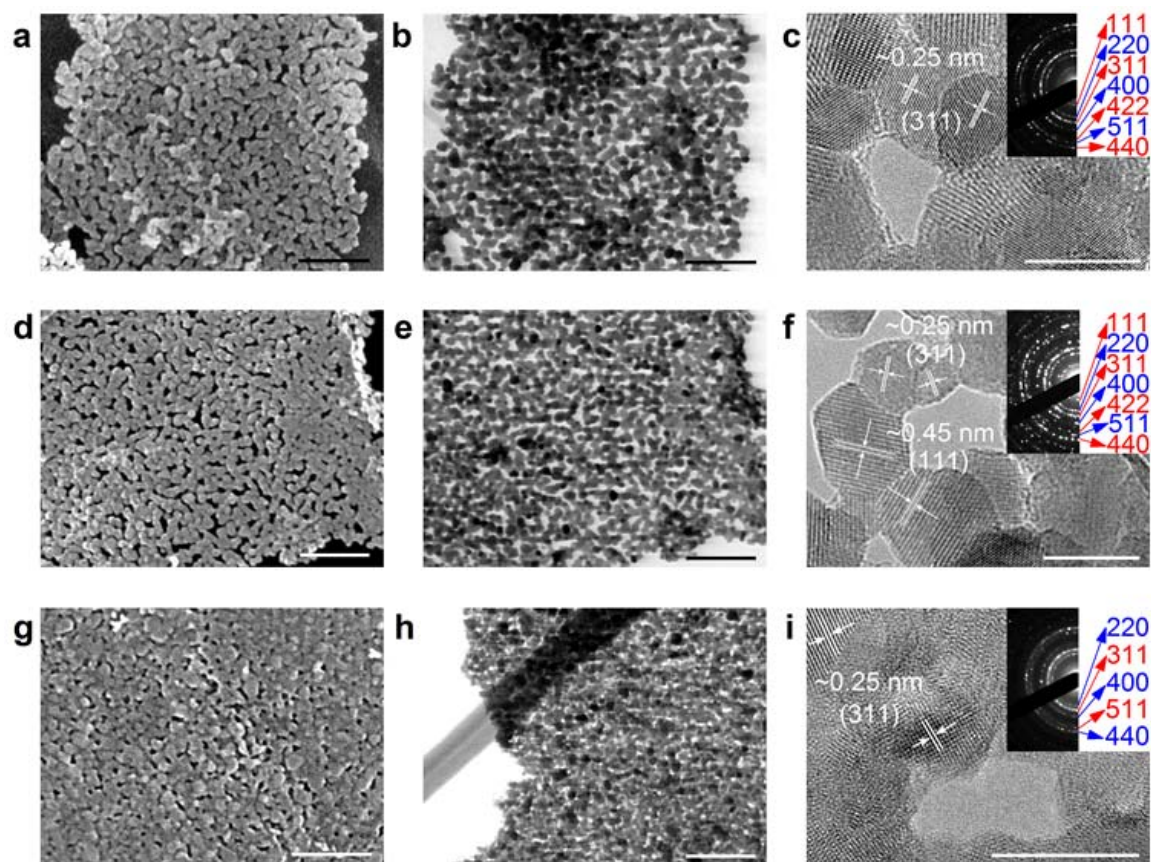

**Supplementary Figure 9 | Electron microscopic images of versatile 2D holey MTMO nanosheets.** SEM images (**a**, **d**, **g**), STEM images (**b**, **e**, **h**) and high-magnification TEM images and SAED patterns (**c**, **f**, **i**) of 2D holey nanosheets of ZCO (**a-c**), NCO (**d-f**), and CFO (**g-i**). Scale bar, 100 nm (**a**, **b**, **d**, **e**, **g**, **h**), 10 nm (**c**, **f**, **i**).

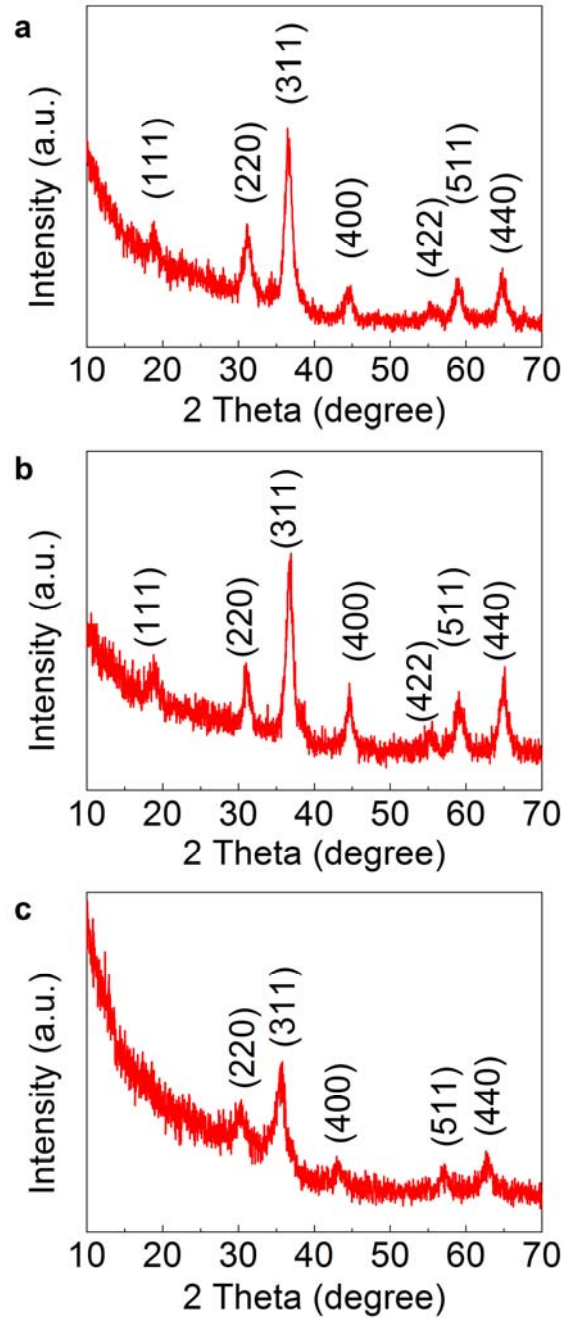

**Supplementary Figure 10 | XRD patterns of 2D holey MTMO nanosheets. (a)** 2D holey  $\text{ZnCo}_2\text{O}_4$  (ZCO) nanosheets, **(b)** 2D holey  $\text{NiCo}_2\text{O}_4$  (NCO) nanosheets, **(c)** 2D holey  $\text{CoFe}_2\text{O}_4$  (CFO) nanosheets.

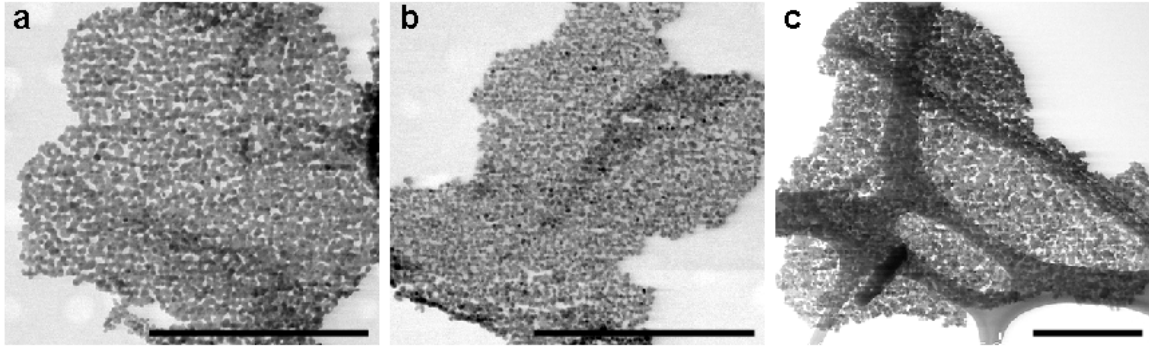

**Supplementary Figure 11 | Scanning electron microscopic images of 2D holey simple TMO nanosheets. (a) 2D holey Co<sub>3</sub>O<sub>4</sub> nanosheets; (b) 2D holey Mn<sub>2</sub>O<sub>3</sub> nanosheets; (c) 2D holey Fe<sub>2</sub>O<sub>3</sub> nanosheets. Scale bar in a, b, c: 500 nm.**

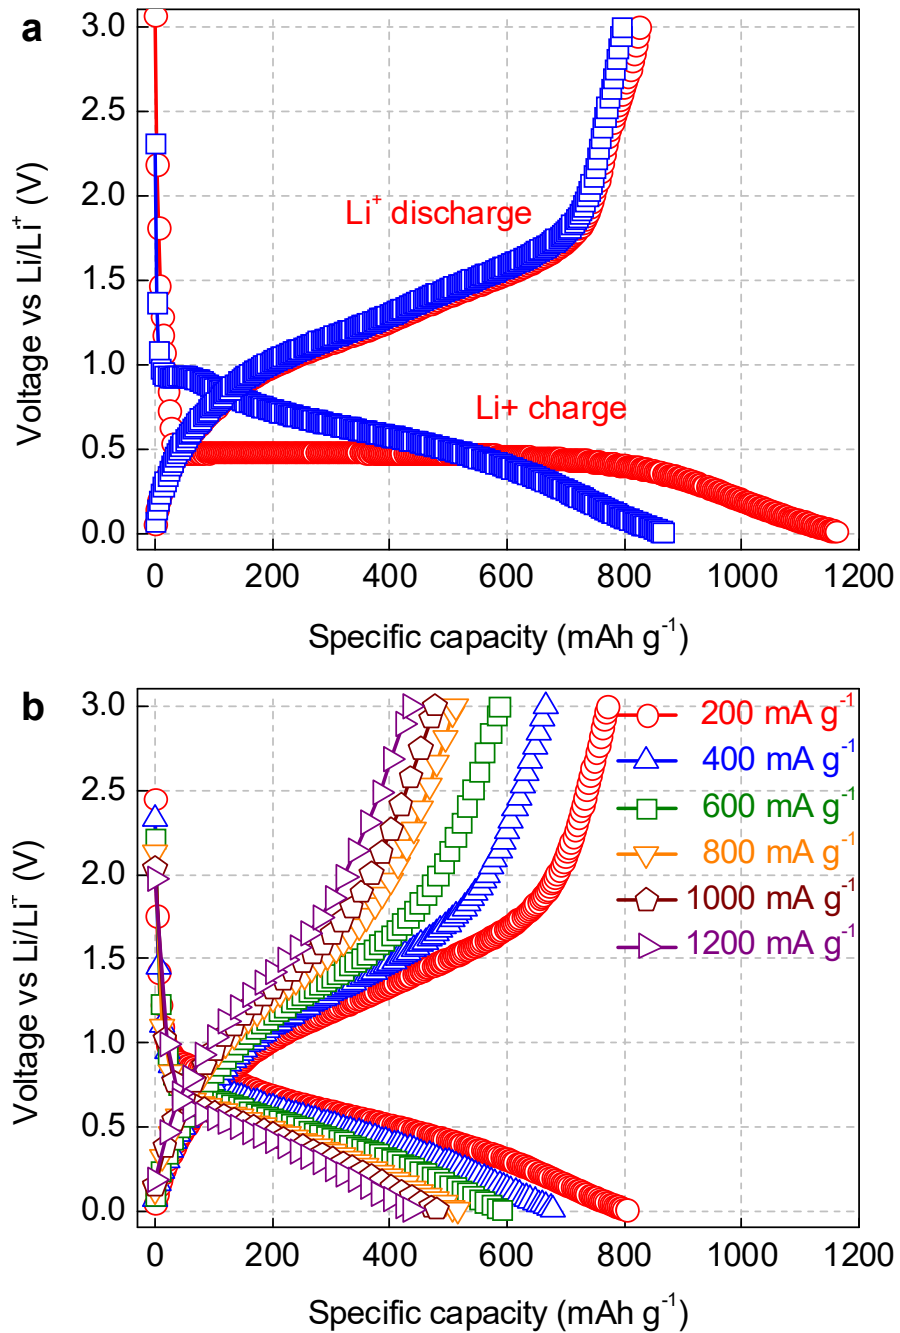

**Supplementary Figure 12 | Electrochemical performances of 2D holey ZMO nanosheets.** (a) Charge and discharge curves of 2D holey ZMO nanosheets for the first two cycles at a current density of 200 mA g<sup>-1</sup>. (b) Representative charge and discharge curves of 2D holey ZMO nanosheets at various current densities.

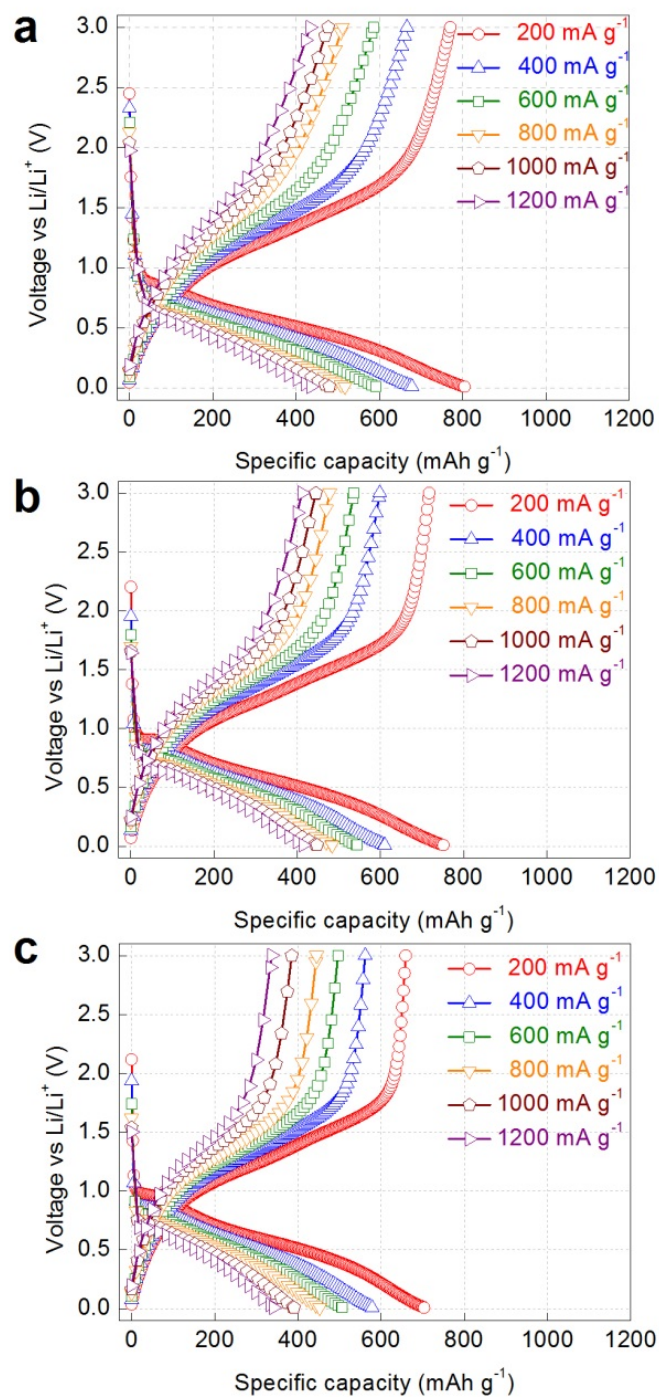

**Supplementary Figure 13 | Charge/discharge curves of the holey ZMO nanosheets obtained at different temperatures at various current densities from 200 mA g<sup>-1</sup> to 1200 mA g<sup>-1</sup>. (a) 2D holey ZMO nanosheets obtained at 400 °C; (b) 2D holey ZMO nanosheets obtained at 500 °C; (c) 2D holey ZMO nanosheets obtained at 600 °C**

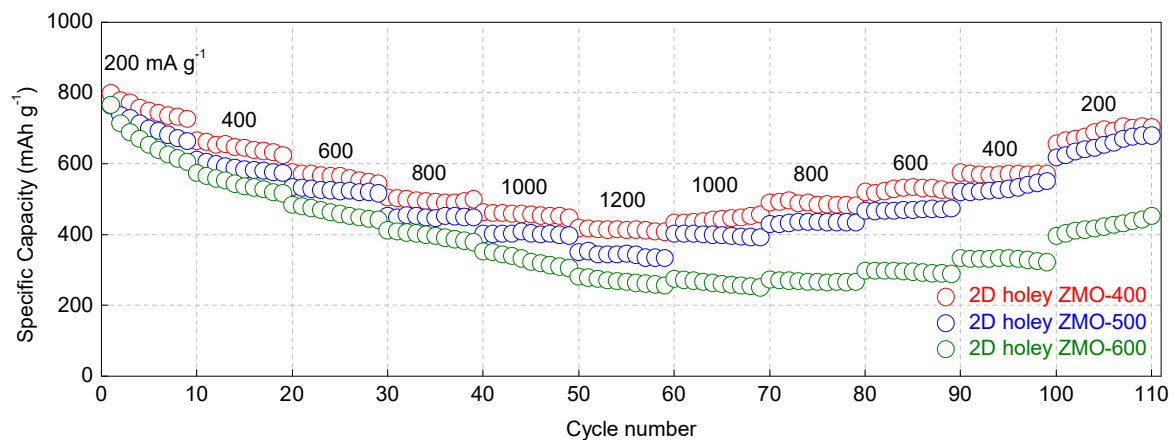

**Supplementary Figure 14 | Rate performances of 2D holey ZMO nanosheets prepared at different temperature.** 2D holey ZMO-400, 2D holey ZMO-500, and 2D holey ZMO-600 stand for the 2D holey ZMO nanosheets prepared at 400, 500, and 600 °C, respectively.

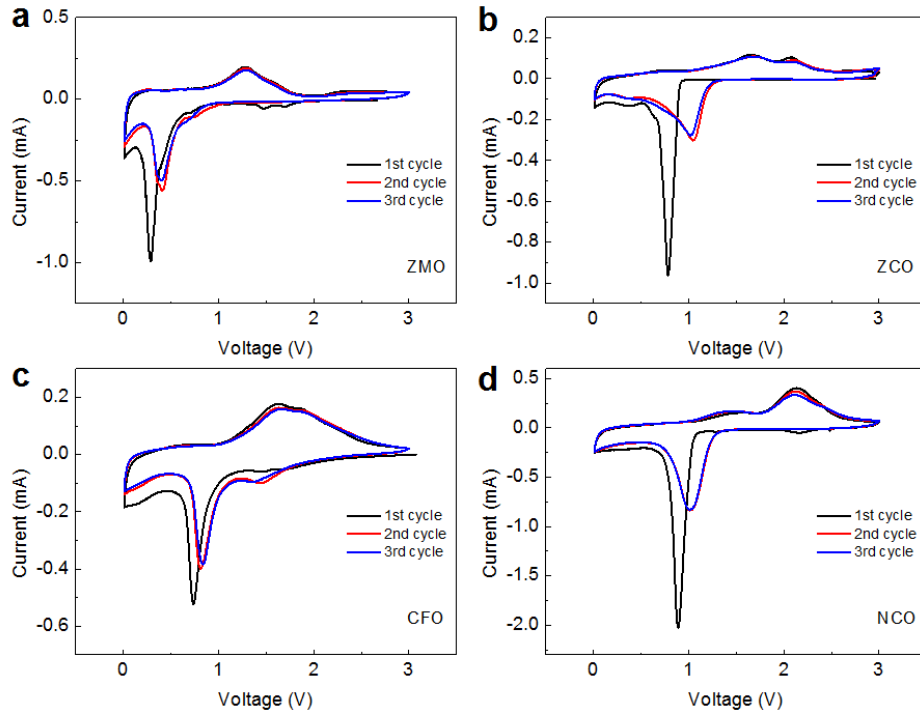

**Supplementary Figure 15 | CV curves of the holey ZMO (a), holey ZCO (b), holey CFO (c) and holey NCO (d) nanosheets at scanning rate of 0.1 mV/s.**

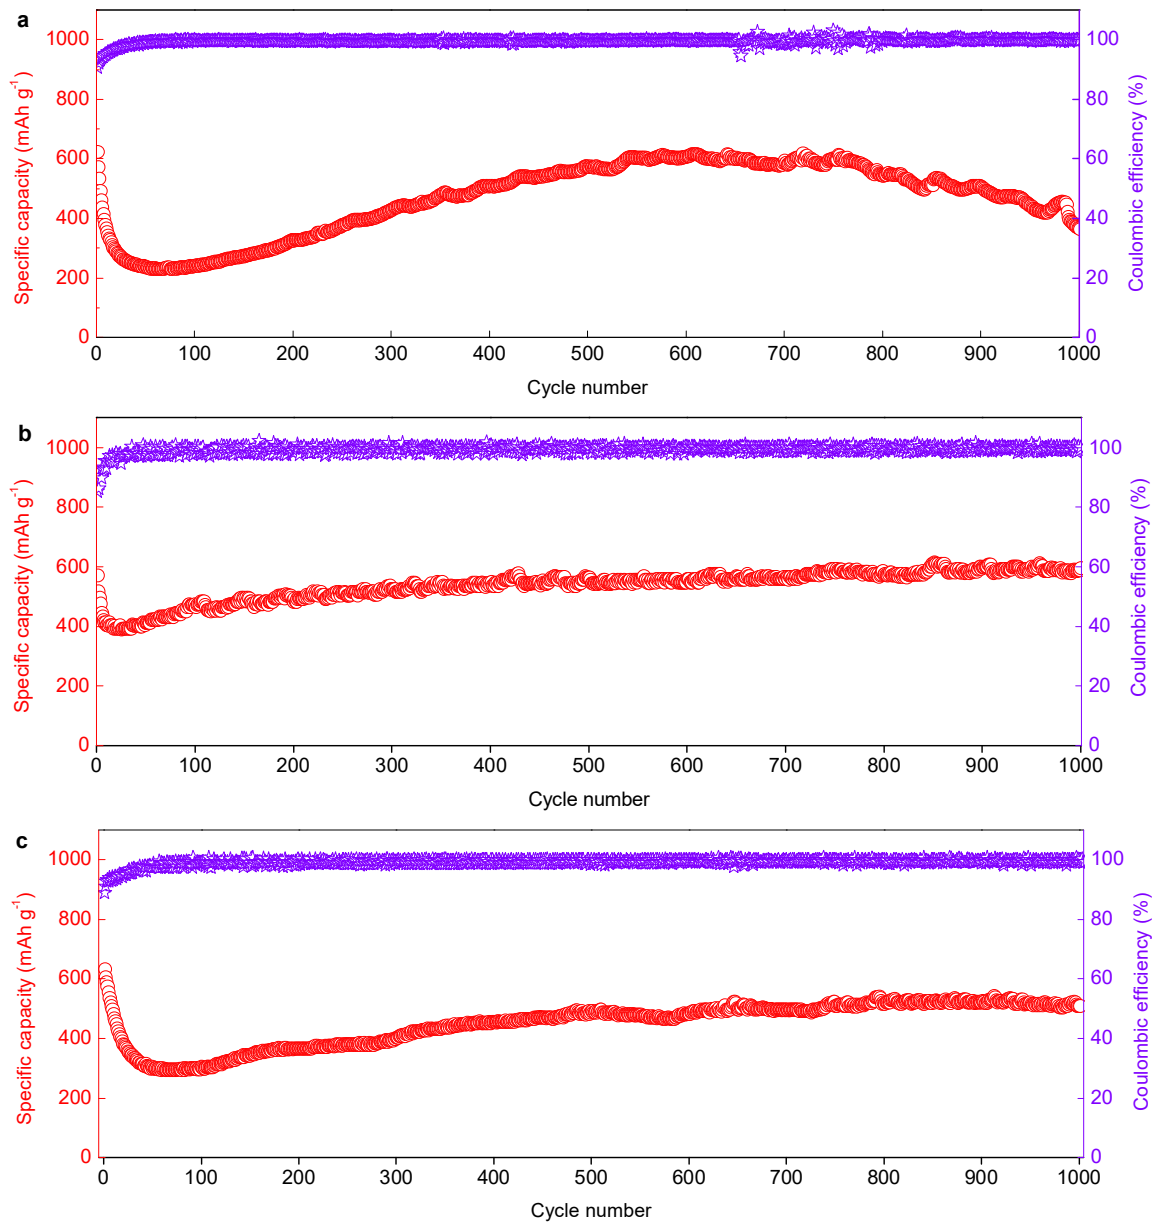

**Supplementary Figure 16 | Cycling performance of 2D holey MTMO nanosheets as anodes for lithium-ion battery. (a) 2D holey ZCO nanosheets, (b) 2D holey NCO nanosheets (more reasonable data will get if possible), and (c) 2D holey CFO nanosheets at  $1000 \text{ mA g}^{-1}$  for 1000 cycles.**



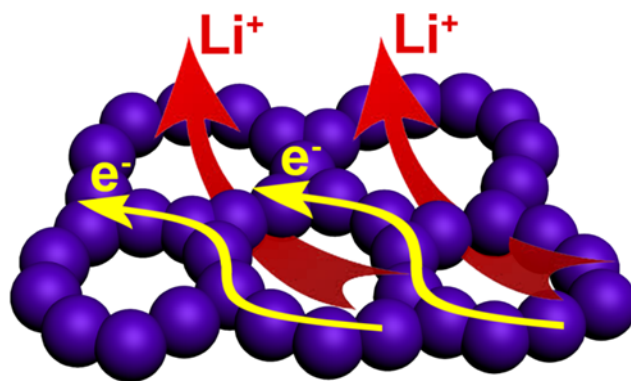

**Supplementary Figure 17 | Schematic illustration of the electrochemical process.** 2D holey MTMO nanosheets enable facile diffusion of  $\text{Li}^+$  ion through the nano-holes, and continuous transport of electrons along within well interconnected nanocrystals.

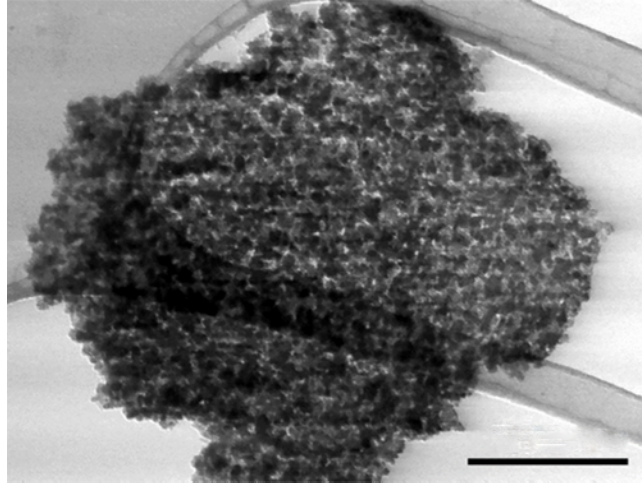

**Supplementary Figure 18 | STEM image of 2D holey ZMO nanosheets after 100 cycles.** The 2D holey nanostructures were reserved. To prepare the STEM sample, the cell was opened after several cycling, the 2D holey ZMO nanosheets anode washed with dimethyl carbonate (DMC) and sonicated in ethanol, and then the ethanol suspension was drop dried onto a STEM grid. Scale bar, 200 nm.

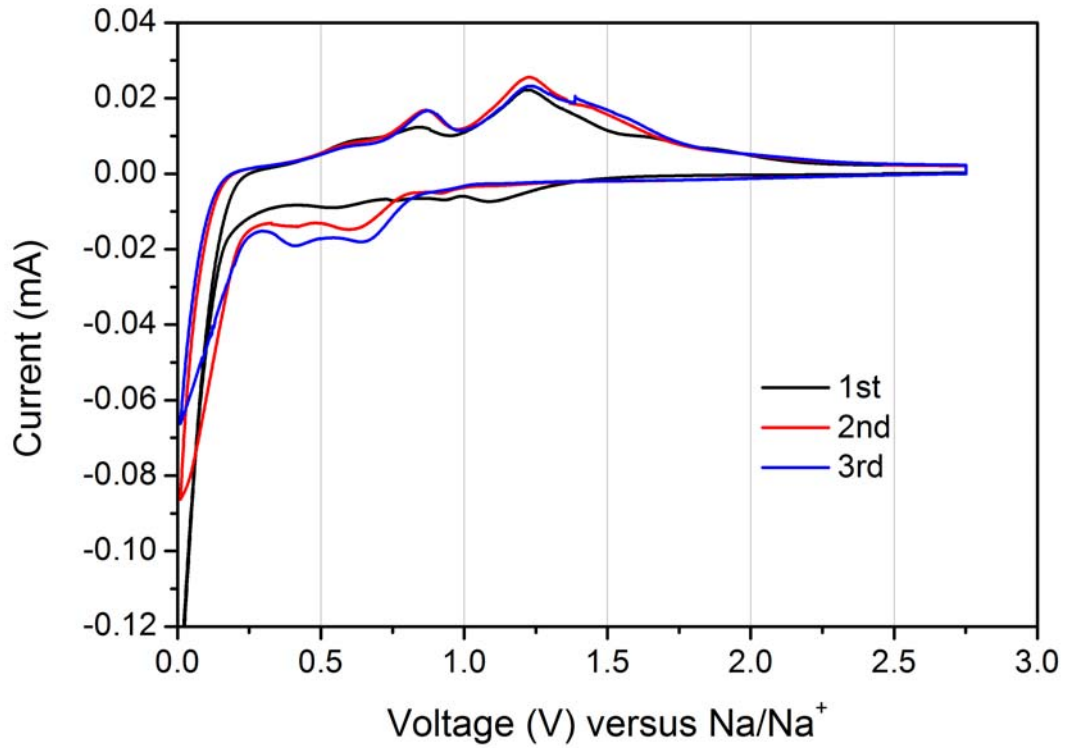

**Supplementary Figure 19 | CV curves of the 2D holey NCO nanosheets for the first three cycles at the scan rate of 0.1 mV s<sup>-1</sup>.**

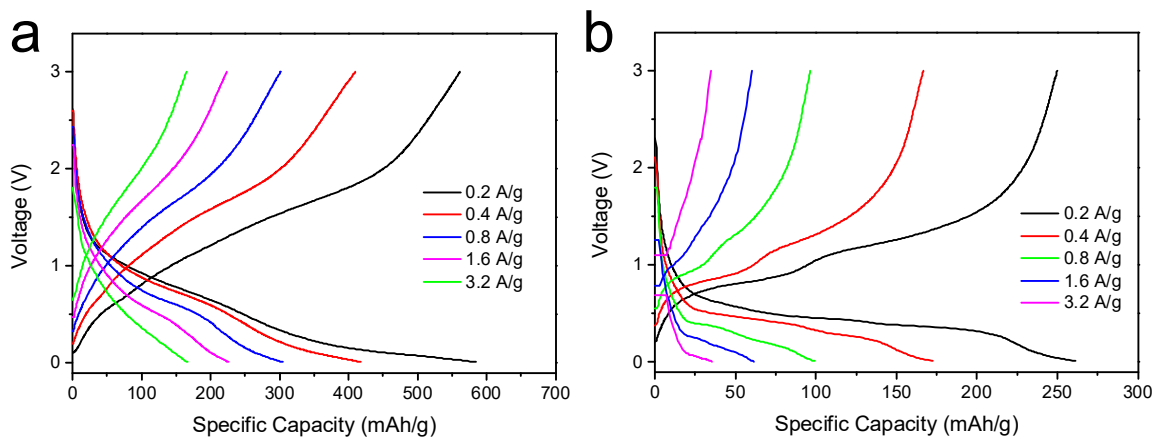

**Supplementary Figure 20 | Charge-discharge curves of NCO electrodes at different current densities. (a) 2D holey NCO nanosheets; (b) controlled 2D NCO nanosheets without porosity.**

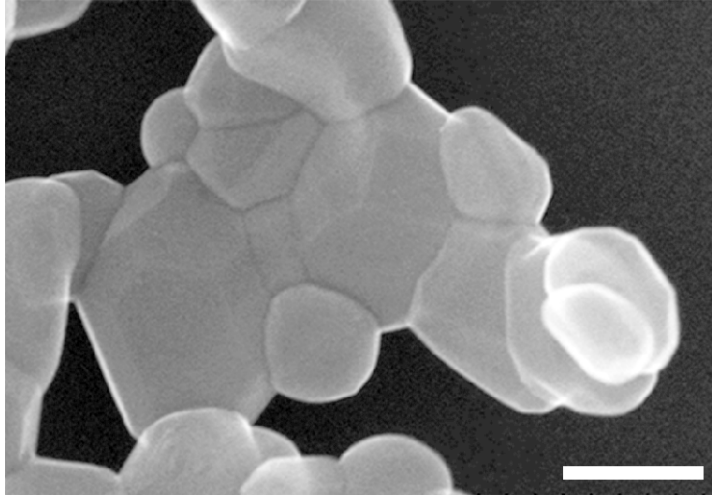

**Supplementary Figure 21 | SEM image of the control 2D NCO nanoplates without porosity. Scale bar, 100 nm.**

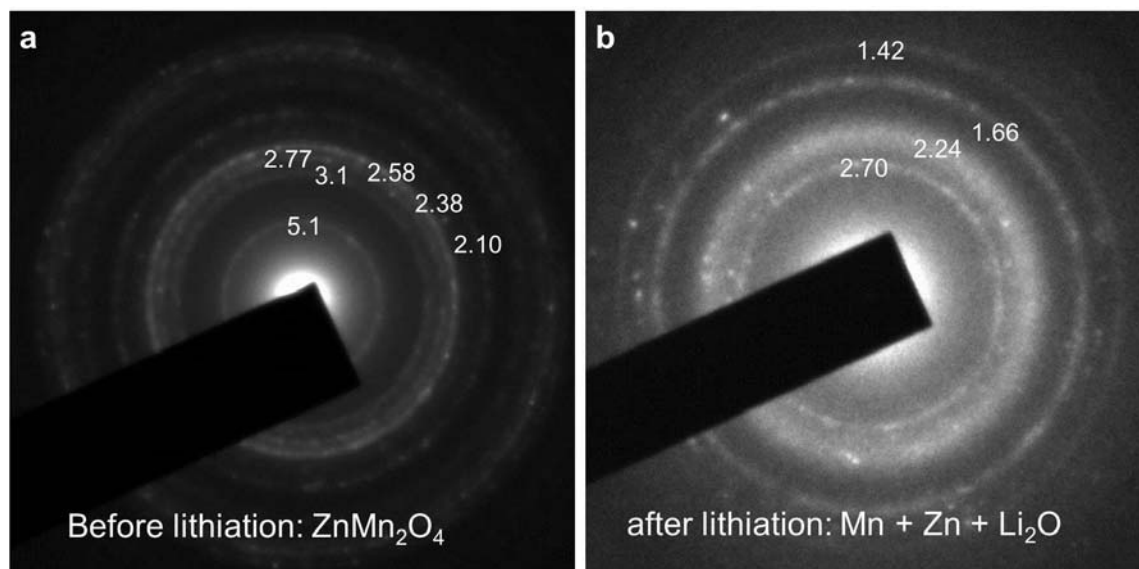

**Supplementary Figure 22 | Selected area electron diffraction pattern of the ZMO nanosheets before and after lithiation. (a) Fresh ZMO nanosheets; (b) ZMO nanosheets after lithiation.**

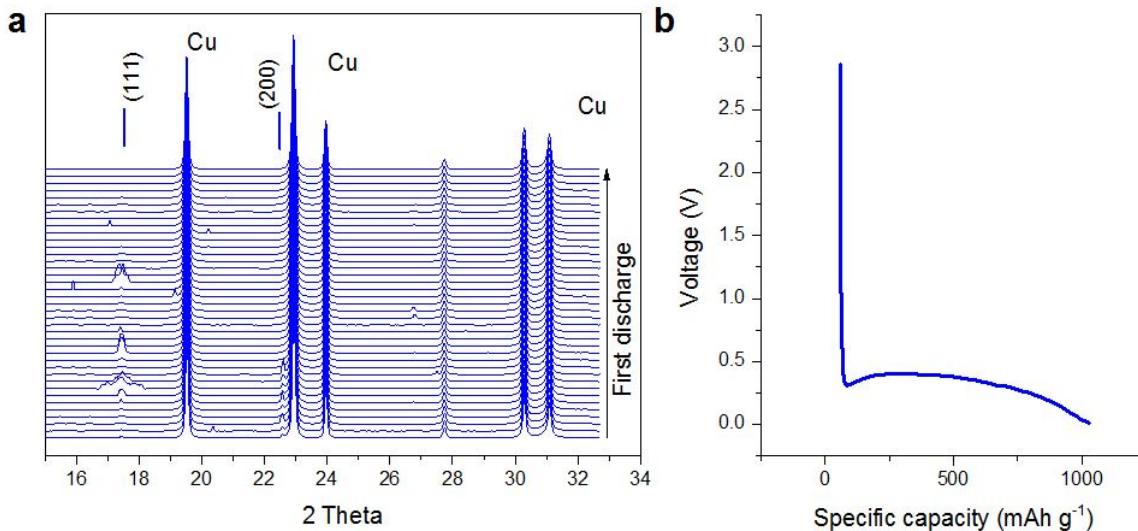

**Supplementary Figure 23 | Operando XRD studies of 2D holey  $\text{ZnMn}_2\text{O}_4$  nanosheets during the first discharge process. (a) XRD patterns of ZMO nanosheets during the first discharge process. (b) The discharge curve of the ZMO nanosheets. ZMO nanosheets deliver high capacity for Li ion storage via the conversion reaction along with Zn and Mn. A reversible capacity corresponding to 8.3 mol of Li per mole of  $\text{ZnMn}_2\text{O}_4$  is expected, assuming  $x \leq 0.5$  for Li intercalation into the spinel lattice ( $\text{ZnMn}_2\text{O}_4 + x\text{Li}^+ + x\text{e}^- \rightarrow \text{Li}_x(\text{ZnMn}_2\text{O}_4)$ ), crystal structure destruction, followed by metal particle formation, and alloy formation with Zn ( $\text{Li}_x(\text{ZnMn}_2\text{O}_4) + (8-x)\text{Li}^+ + (8-x)\text{e}^- \rightarrow \text{Zn} + 2\text{Mn} + 4\text{Li}_2\text{O}$ ;  $\text{Zn} + \text{Li}^+ + \text{e}^- \leftrightarrow \text{ZnLi}$ ). These metallic nanoparticles are dispersed in a lithia ( $\text{Li}_2\text{O}$ ) matrix, with the  $\text{Li}_2\text{O}$  + nanoparticles being surrounded by a solid electrolyte interface. This makes the mixtures amorphous, as identified by the operando XRD tests.**

## Supplementary Tables

**Supplementary Table S1.** A summary of recent studies on MTMO-based anode materials for lithium-ion battery.

| Active materials                | Cycling stability<br>(mAh g <sup>-1</sup> )  | Rate capability<br>(mAh g <sup>-1</sup> )                           | Ref |
|---------------------------------|----------------------------------------------|---------------------------------------------------------------------|-----|
| ZMO nanoparticles               |                                              | 555 at 200 mA g <sup>-1</sup><br>280 at 2400 mA g <sup>-1</sup>     | 1   |
| ZMO nanowires                   | 350 at 1000 mA g <sup>-1</sup> (40 cycles)   |                                                                     | 2   |
| ZMO nanorods                    | 517 at 500 mA g <sup>-1</sup> (100 cycles)   | 810 at 50 mA g <sup>-1</sup><br>457 at 1000 mA g <sup>-1</sup>      | 3   |
| ZMO tubules                     | 784.3 at 100 mA g <sup>-1</sup> (100 cycles) | 644.6 at 100 mA g <sup>-1</sup><br>243.5 at 3200 mA g <sup>-1</sup> | 4   |
| flower-like ZMO microstructures | 626 at 100 mA g <sup>-1</sup> (50 cycles)    |                                                                     | 5   |
| ZMO hollow microspheres         | 607 at 400 mA g <sup>-1</sup> (100 cycles)   | 791 at 200 mA g <sup>-1</sup><br>361 at 1600 mA g <sup>-1</sup>     | 6   |
| ZMO hollow microspheres         | 750 at 400 mA g <sup>-1</sup> (120 cycles)   | 683 at 600 mA g <sup>-1</sup><br>396 at 1200 mA g <sup>-1</sup>     | 7   |
| ZCO nanoparticles               | 894 at 60 mA g <sup>-1</sup> (60 cycles)     |                                                                     | 8   |
| porous ZCO nanotubes            | 841 at 1000 mA g <sup>-1</sup> (30 cycles)   |                                                                     | 9   |
| porous ZCO nanoflakes           | 750 at 80 mA g <sup>-1</sup> (50 cycles)     |                                                                     | 10  |
| ZCO microsphere                 | 721 at 100 mA g <sup>-1</sup> (80 cycles)    | 970 at 100 mA g <sup>-1</sup><br>435 at 2000 mA g <sup>-1</sup>     | 11  |
| ZCO nanosheets                  | 980 at 200 mA g <sup>-1</sup> (200 cycles)   | 1034 at 200 mA g <sup>-1</sup><br>607 at 1000 mA g <sup>-1</sup>    | 12  |
| ZnO/ZCO nanosheets              | 730 at 500 mA g <sup>-1</sup> (150 cycles)   | 880 at 200 mA g <sup>-1</sup><br>500 at 2000 mA g <sup>-1</sup>     | 13  |



|                                 |                                             |                                                                     |    |
|---------------------------------|---------------------------------------------|---------------------------------------------------------------------|----|
| NCO nanocubes                   | 1058 at 100 mA g <sup>-1</sup> (100 cycles) |                                                                     | 14 |
| flower-like NCO microstructures | 640 at 500 mA g <sup>-1</sup> (60 cycles)   | 680 at 250 mA g <sup>-1</sup><br>420 at 2000 mA g <sup>-1</sup>     | 15 |
| NCO microsphere                 | 705 at 800 mA g <sup>-1</sup> (500 cycles)  | 1260 at 100 mA g <sup>-1</sup><br>393 at 1600 mA g <sup>-1</sup>    | 16 |
| NCO nanosheets                  | 805 at 200 mA g <sup>-1</sup> (100 cycles)  | 1018 at 200 mA g <sup>-1</sup><br>486 at 1000 mA g <sup>-1</sup>    | 17 |
| Mesoporous NCO nanosheets       | 204 at 200 mA g <sup>-1</sup> (50 cycles)   | 142 at 1000 mA g <sup>-1</sup>                                      | 18 |
| NCO nanosheet networks          | 1170 at 200 mA g <sup>-1</sup> (50 cycles)  | 1343 at 200 mA g <sup>-1</sup><br>780 at 2000 mA g <sup>-1</sup>    | 19 |
| NCO nanosheets                  | 767 at 100 mA g <sup>-1</sup> (50 cycles)   | 1149 at 100 mA g <sup>-1</sup><br>487 at 1000 mA g <sup>-1</sup>    | 20 |
| CFO microsphere                 | 733.5 at 200 mA g <sup>-1</sup> (50 cycles) | 744.1 at 1000 mA g <sup>-1</sup><br>790.5 at 200 mA g <sup>-1</sup> | 21 |
| ZMO nanosheets@CNT              | 625 at 306 mA g <sup>-1</sup> (100 cycles)  | 819 at 62 mA g <sup>-1</sup><br>528 at 1224 mA g <sup>-1</sup>      | 22 |
| ZMO/graphene                    | 707 at 100 mA g <sup>-1</sup> (50 cycles)   | 980 at 100 mA g <sup>-1</sup><br>440 at 2000 mA g <sup>-1</sup>     | 23 |
| ZCO/Ni foam                     | 1100 at 500 mA g <sup>-1</sup> (50 cycles)  |                                                                     | 24 |
| ZCO/Ni foam                     | 900 at 416 mA g <sup>-1</sup> (50 cycles)   | 1180 at 111 mA g <sup>-1</sup><br>485 at 1111 mA g <sup>-1</sup>    | 25 |
| ZCO/carbon fibers               | 1180 at 180 mA g <sup>-1</sup> (100 cycles) |                                                                     | 26 |
| ZCO/carbon cloth                | 1200 at 200 mA g <sup>-1</sup> (160 cycles) | 1200 at 180 mA g <sup>-1</sup><br>605 at 4500 mA g <sup>-1</sup>    | 27 |

|                         |                                                                                             |                                                                      |                  |
|-------------------------|---------------------------------------------------------------------------------------------|----------------------------------------------------------------------|------------------|
| ZCO nanosheets/graphene | 961 at 90 mA g <sup>-1</sup> (90 cycles)                                                    | 963 at 90 mA g <sup>-1</sup><br>593 at 900 mA g <sup>-1</sup>        | 28               |
| NCO nanosheet/C         | 998 at 200 mA g <sup>-1</sup> (50 cycles)                                                   | 976 at 100 mA g <sup>-1</sup><br>603 at 800 mA g <sup>-1</sup>       | 29               |
| NCO/graphene            | 816 at 100 mA g <sup>-1</sup> (70 cycles)                                                   | 396 at 800 mA g <sup>-1</sup><br>974 at 100 mA g <sup>-1</sup>       | 30               |
| CFO/CNT                 | 1045 at 200 mA g <sup>-1</sup> (100 cycles)                                                 | 1137.6 at 200 mA g <sup>-1</sup><br>621.7 at 2000 mA g <sup>-1</sup> | 31               |
| CFO/graphene            | 565 at 800 mA g <sup>-1</sup> (300 cycles)                                                  | 1290 at 50 mA g <sup>-1</sup><br>730 at 800 mA g <sup>-1</sup>       | 32               |
| 2D holey ZMO nanosheets | ~430 at 800 mA g <sup>-1</sup> (50 cycles)<br>~360 at 1000 mA g <sup>-1</sup> (1000 cycles) | ~770 at 200 mA g <sup>-1</sup><br>~430 at 1200 mA g <sup>-1</sup>    | <i>This work</i> |
| 2D holey ZCO nanosheets | ~360 at 1000 mA g <sup>-1</sup> (1000 cycles)                                               |                                                                      | <i>This work</i> |
| 2D holey NCO nanosheets | ~600 at 1000 mA g <sup>-1</sup> (1000 cycles)                                               |                                                                      | <i>This work</i> |
| 2D holey CFO nanosheets | ~510 at 1000 mA g <sup>-1</sup> (1000 cycles)                                               |                                                                      | <i>This work</i> |

## Supplementary References

1. Deng, Y. *et al.* Controllable synthesis of spinel nano-ZnMn<sub>2</sub>O<sub>4</sub> via a single source precursor route and its high capacity retention as anode material for lithium ion batteries. *J. Mater. Chem.* **21**, 11987–11995 (2011).
2. Kim, S.-W. *et al.* Electrochemical performance and ex situ analysis of ZnMn<sub>2</sub>O<sub>4</sub> nanowires as anode materials for lithium rechargeable batteries. *Nano Res.* **4**, 505–510 (2011).
3. Bai, Z. *et al.* Facile synthesis of loaf-like ZnMn<sub>2</sub>O<sub>4</sub> nanorods and their excellent performance in Li-ion batteries. *Nanoscale* **5**, 2442–2447 (2013).
4. Kim, J. G., Lee, S. H., Kim, Y. & Kim, W. B. Fabrication of free-standing ZnMn<sub>2</sub>O<sub>4</sub> mesoscale tubular arrays for lithium-ion anodes with highly reversible lithium storage properties. *ACS Appl. Mater. Interfaces* **5**, 11321–11328 (2013).
5. Xiao, L., Yang, Y., Yin, J., Li, Q. & Zhang, L. Low temperature synthesis of flower-like ZnMn<sub>2</sub>O<sub>4</sub> superstructures with enhanced electrochemical lithium storage. *J. Power Sources* **194**, 1089–1093 (2009).
6. Zhou, L., Wu, H. B., Zhu, T. & Lou, X. W. Facile preparation of ZnMn<sub>2</sub>O<sub>4</sub> hollow microspheres as high-capacity anodes for lithium-ion batteries. *J. Mater. Chem.* **22**, 827–829 (2012).
7. Zhang, G., Yu, L., Wu, H. B., Hoster, H. E. & Lou, X. W. Formation of ZnMn<sub>2</sub>O<sub>4</sub> ball-in-ball hollow microspheres as a high-performance anode for lithium-ion batteries. *Adv. Mater.* **24**, 4609–4613 (2012).
8. Sharma, Y., Sharma, N., Subba Rao, G. V. & Chowdari, B. V. R. Nanophase ZnCo<sub>2</sub>O<sub>4</sub> as a high performance anode material for Li-ion batteries. *Adv. Funct. Mater.* **17**, 2855–2861 (2007).
9. Luo, W., Hu, X., Sun, Y. & Huang, Y. Electrospun porous ZnCo<sub>2</sub>O<sub>4</sub> nanotubes as a high-performance anode material for lithium-ion batteries. *J. Mater. Chem.* **22**, 8916–8921 (2012).
10. Qiu, Y., Yang, S., Deng, H., Jin, L. & Li, W. A novel nanostructured spinel ZnCo<sub>2</sub>O<sub>4</sub> electrode material: morphology conserved transformation from a hexagonal shaped nanodisk precursor and application in lithium ion batteries. *J. Mater. Chem.* **20**, 4439–4444 (2010).

11. Hu, L. *et al.* Facile synthesis of uniform mesoporous ZnCo<sub>2</sub>O<sub>4</sub> microspheres as a high-performance anode material for Li-ion batteries. *J. Mater. Chem. A* **1**, 5596–5602 (2013).
12. Zhu, Y. *et al.* Two-dimensional ultrathin ZnCo<sub>2</sub>O<sub>4</sub> nanosheets: general formation and lithium storage application. *J. Mater. Chem. A* **3**, 9556–9564 (2015).
13. Zhen, M. *et al.* Synthesis of hierarchical ZnO/ZnCo<sub>2</sub>O<sub>4</sub> nanosheets with mesostructures for lithium-ion anodes. *RSC Adv.* **6**, 43551–43555 (2016).
14. Guo, H. *et al.* Accurate hierarchical control of hollow crossed NiCo<sub>2</sub>O<sub>4</sub> nanocubes for superior lithium storage. *Nanoscale* **6**, 5491–5497 (2014).
15. Li, L. *et al.* The facile synthesis of hierarchical porous flower-like NiCo<sub>2</sub>O<sub>4</sub> with superior lithium storage properties. *J. Mater. Chem. A* **1**, 10935–10941 (2013).
16. Li, J., Xiong, S., Liu, Y., Ju, Z. & Qian, Y. High electrochemical performance of monodisperse NiCo<sub>2</sub>O<sub>4</sub> mesoporous microspheres as an anode material for Li-ion batteries. *ACS Appl. Mater. Interfaces* **5**, 981–988 (2013).
17. Zhu, Y. *et al.* A Simple Synthesis of Two-Dimensional Ultrathin Nickel Cobaltite Nanosheets for Electrochemical Lithium Storage. *Electrochim. Acta* **176**, 141–148 (2015).
18. Zhou, K. *et al.* Mesoporous NiCo<sub>2</sub>O<sub>4</sub> nanosheets with enhance sodium ion storage properties. *J. Alloys Compd.* **651**, 24–28 (2015).
19. Leng, X. *et al.* Ultrathin Mesoporous NiCo<sub>2</sub>O<sub>4</sub> Nanosheet Networks as High-Performance Anodes for Lithium Storage. *ChemPlusChem* **80**, 1725–1731 (2015).
20. Mondal, A. *et al.* A Microwave Synthesis of Mesoporous NiCo<sub>2</sub>O<sub>4</sub> Nanosheets as Electrode Materials for Lithium-Ion Batteries and Supercapacitors. *ChemPhysChem* **16**, 169–175 (2015).
21. Xiong, Q. Q. *et al.* Ascorbic acid-assisted synthesis of cobalt ferrite (CoFe<sub>2</sub>O<sub>4</sub>) hierarchical flower-like microspheres with enhanced lithium storage properties. *J. Power Sources* **256**, 153–159 (2014).
22. Yuan, C. *et al.* Heterostructured core–shell ZnMn<sub>2</sub>O<sub>4</sub> nanosheets@carbon nanotubes' coaxial nanocables: a competitive anode towards high-performance Li-ion batteries. *Nanotechnology* **26**, 145401 (2015).

23. Zheng, Z., Cheng, Y., Yan, X., Wang, R. & Zhang, P. Enhanced electrochemical properties of graphene-wrapped ZnMn<sub>2</sub>O<sub>4</sub> nanorods for lithium-ion batteries. *J. Mater. Chem. A* **2**, 149–154 (2014).
24. Qu, B. *et al.* High-performance lithium-ion battery anode by direct growth of hierarchical ZnCo<sub>2</sub>O<sub>4</sub> nanostructures on current collectors. *ACS Appl. Mater. Interfaces* **6**, 731–736 (2013).
25. Long, H. *et al.* Synthesis of a nanowire self-assembled hierarchical ZnCo<sub>2</sub>O<sub>4</sub> shell/Ni current collector core as binder-free anodes for high-performance Li-ion batteries. *J. Mater. Chem. A* **2**, 3741–3748 (2014).
26. Liu, B. *et al.* Advanced rechargeable lithium-ion batteries based on bendable ZnCo<sub>2</sub>O<sub>4</sub>-urchins-on-carbon-fibers electrodes. *Nano Res.* **6**, 525–534 (2013).
27. Liu, B. *et al.* Hierarchical three-dimensional ZnCo<sub>2</sub>O<sub>4</sub> nanowire arrays/carbon cloth anodes for a novel class of high-performance flexible lithium-ion batteries. *Nano Lett.* **12**, 3005–3011 (2012).
28. Gao, G. *et al.* Growth of Ultrathin ZnCo<sub>2</sub>O<sub>4</sub> Nanosheets on Reduced Graphene Oxide with Enhanced Lithium Storage Properties. *Adv. Sci.* **2**, 1400014 (2015).
29. Fan, Z. *et al.* A NiCo<sub>2</sub>O<sub>4</sub> nanosheet-mesoporous carbon composite electrode for enhanced reversible lithium storage. *Carbon* **99**, 633–641 (2016).
30. Chen, Y. *et al.* Reduced graphene oxide networks as an effective buffer matrix to improve the electrode performance of porous NiCo<sub>2</sub>O<sub>4</sub> nanoplates for lithium-ion batteries. *J. Mater. Chem. A* **2**, 4449–4456 (2014).
31. Zhang, Z. *et al.* Mesoporous CoFe<sub>2</sub>O<sub>4</sub> nanospheres cross-linked by carbon nanotubes as high-performance anodes for lithium-ion batteries. *J. Mater. Chem. A* **1**, 7444–7450 (2013).
32. Liu, S. *et al.* Self-assembly of a CoFe<sub>2</sub>O<sub>4</sub>/graphene sandwich by a controllable and general route: towards a high-performance anode for Li-ion batteries. *J. Mater. Chem.* **22**, 19738–19743 (2012).
